# Supplementary material for: Characterization of Volatile Organic Compounds and Aroma of Eight Bamboo Species Leaves
Source: MDPI journal article supplement (doi:10.3390/horticulturae10040394), 2024-04-12
Supplement: s1 [file s1]

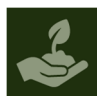

## Article

# Characterization of Volatile Organic Compounds and Aroma of Eight Bamboo Species Leaves

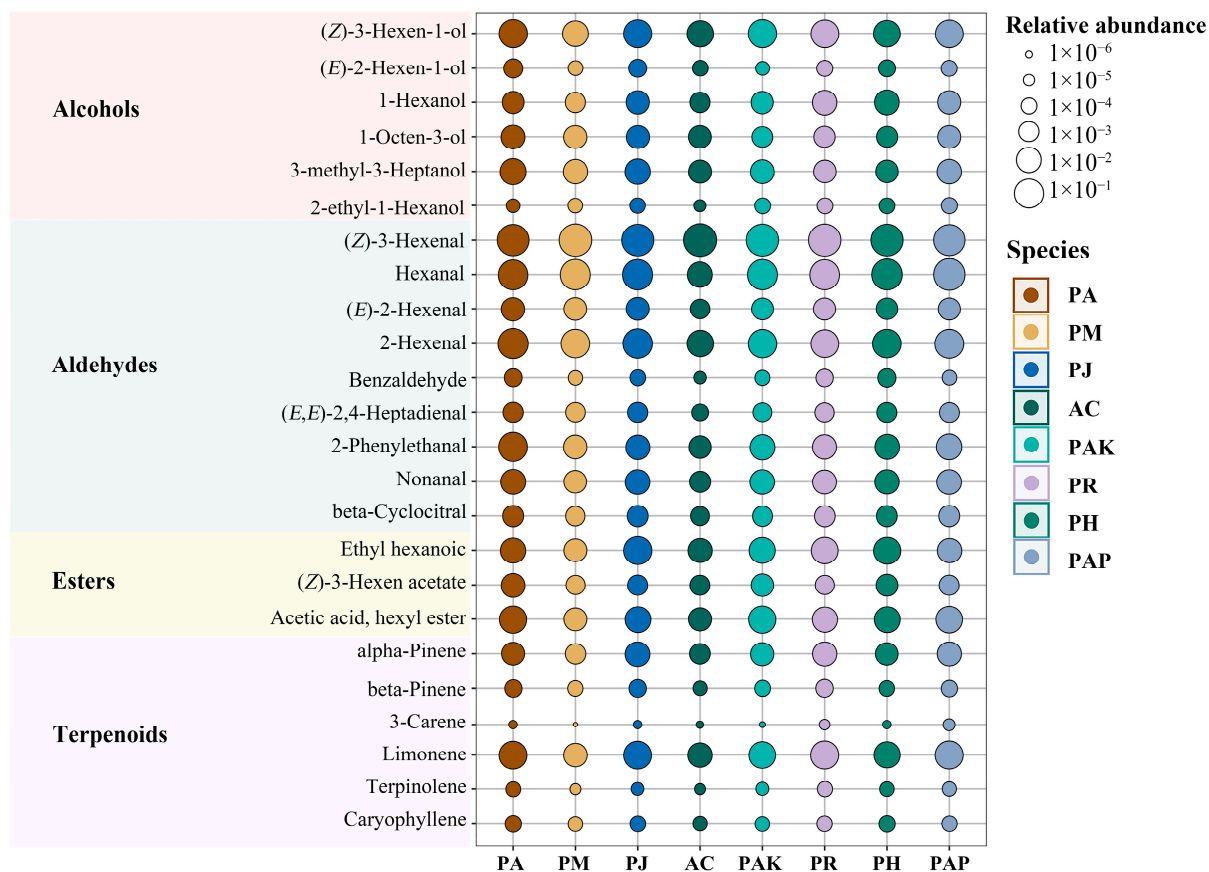

Figure S1. OAV abundance among eight bamboo species leaves.
